# Supplementary material
Source: Elsevier journal article supplement (https://rcastoragev2.blob.core.windows.net/195508ae364a5e355e141570b3130da0/mmc1.pdf)
Supplement: mmc1 [file mmc1.pdf]

**Supplemental information**

**DAXX adds a *de novo* H3.3K9me3 deposition  
pathway to the histone chaperone network**

**Massimo Carraro, Ivo A. Hendriks, Colin M. Hammond, Victor Solis-Mezarino, Moritz Völker-Albert, Jonas D. Elsborg, Melanie B. Weisser, Christos Spanos, Guillermo Montoya, Juri Rappsilber, Axel Imhof, Michael L. Nielsen, and Anja Groth**

## SUPPLEMENTAL FIGURE TITLES AND LEGENDS

Figure S1

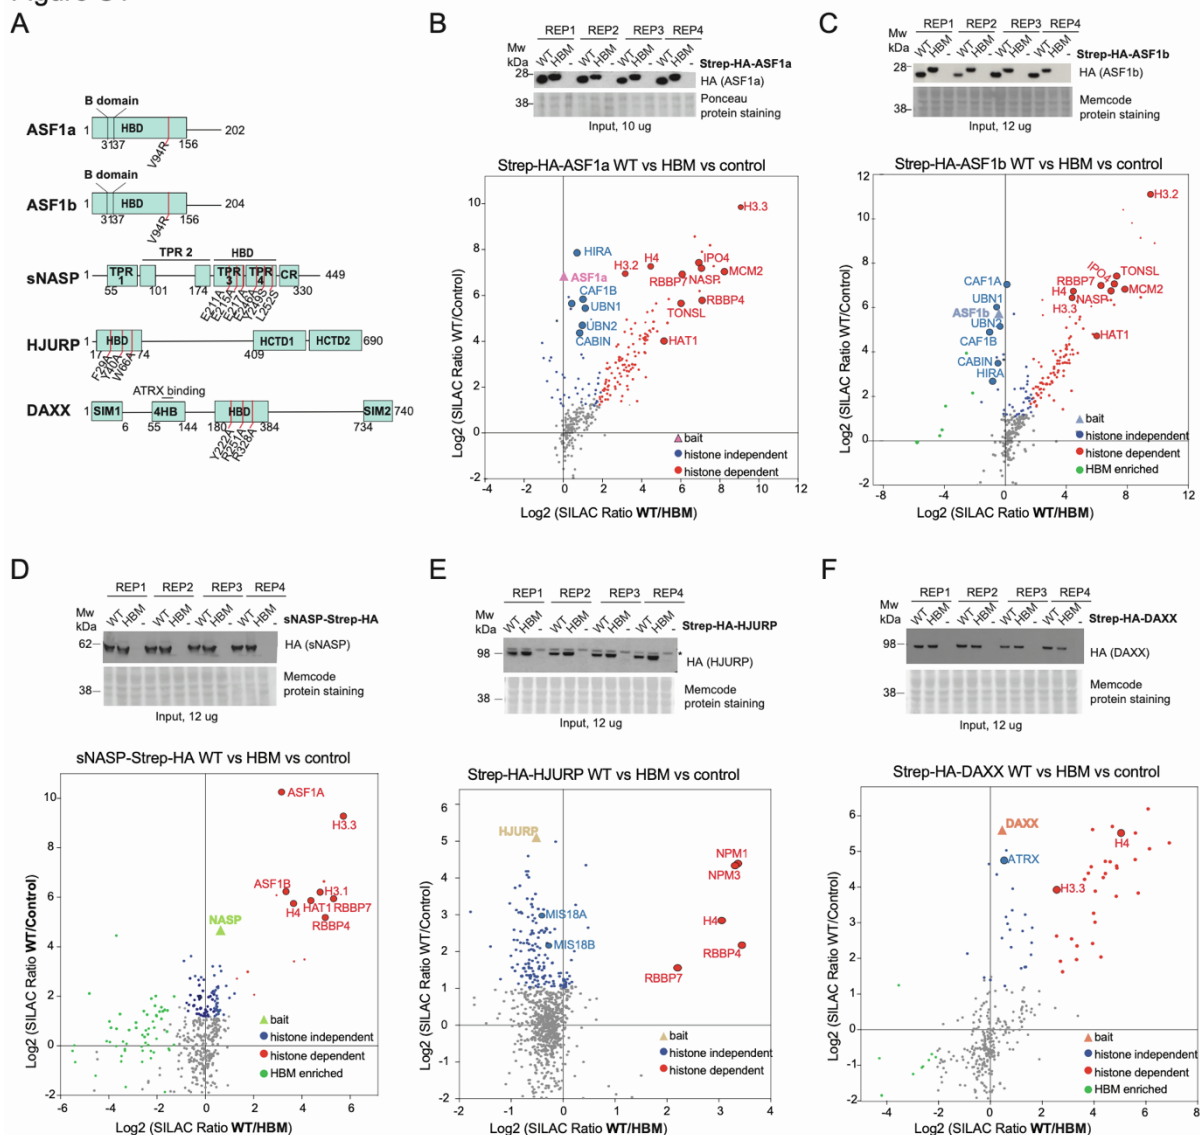

**Figure S1. Input and IP-MS analysis of histone chaperones pulldowns – Related to Figures 1-2.**

(A) Schematic domain architectures of ASF1a, ASF1b, sNASP, HJURP and DAXX. Red lines indicate the point mutations in the histone binding domain (HBD) used to disrupt the protein ability to bind histone H3–H4.

(B-F) Top panels show Western blot analysis of soluble extracts from cells expressing STREP-HA-tagged ASF1a, ASF1b, sNASP, HJURP and DAXX (WT or HBM) and control cells (-), used to perform the triple SILAC IP/MS pull-downs shown in **Figures 1-2**. The panel show n=4 biological replicates. \*, unspecific band. Bottom panels show mass spectrometry analysis of SILAC labelled pull-downs of ASF1a, ASF1b, sNASP, HJURP and DAXX, WT and HBM and control. Each pull-down was performed from soluble cell extracts, n=4 biological replicates. Proteins referred to by human UniProt protein identification code. The proteins nodes and names are colored according to the threshold indicated in **Table S1**. Red, blue, and green indicate histone-dependent, -independent, and HBM enriched factors, respectively.

Figure S2

A

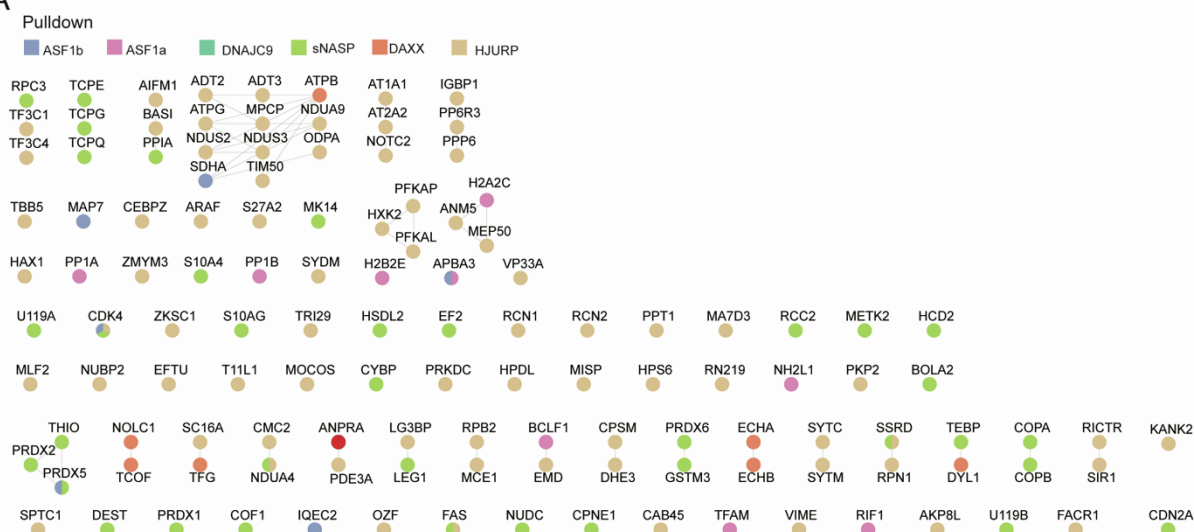

B

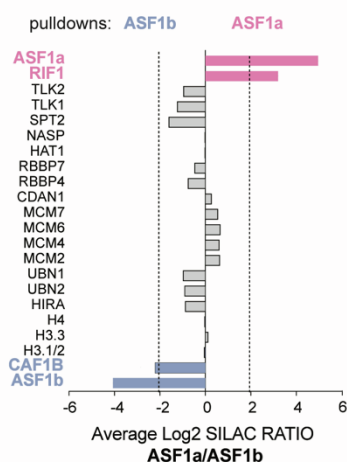

**Figure S2. Analysis of histone-independent chaperone interactome – Related to Figure 1.**

(A) Histone-independent interactors from clustered analysis not shown in Figure 1D, generated using the STRING database and MCL clustering function. Edges indicates Protein-protein interactions according to the string database.

(B) Mass spectrometry analysis of SILAC labelled pull-downs of wild type ASF1a and ASF1b and control cell from soluble cell extracts; n=2 biological replicates. Bar plots represent the average SILAC ratio.

(A-B) Proteins referred to by human UniProt protein identification code.

Figure S3

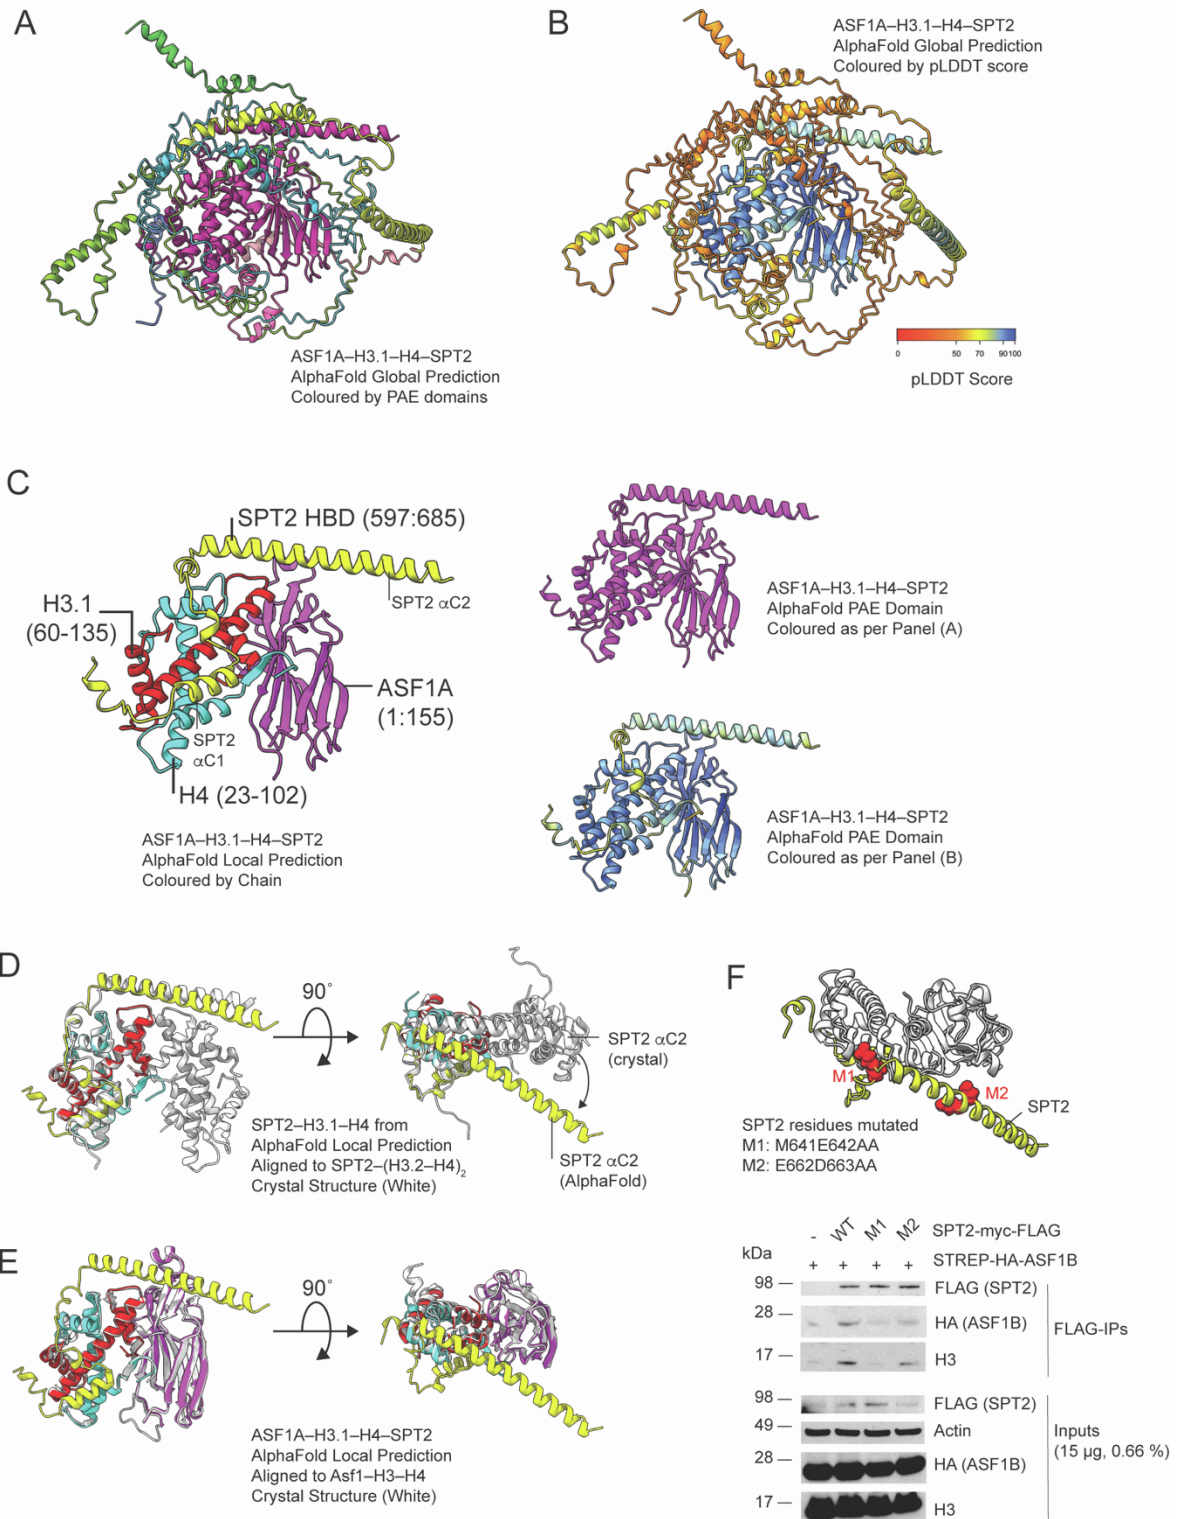

**Figure S3. Structural characterization of ASF1-SPT2 co-chaperone complex – Related to Figure 3C-E**

(A) 'Global' AlphaFold prediction of the SPT2–H3.1–H4–ASF1A histone co-chaperone complex colored by PAE domains, in magenta is the region of SPT2–H3.1–H4–SPT2 related to Figure 3C-D.

(B) 'Global' AlphaFold prediction of the SPT2–H3.1–H4–ASF1A histone co-chaperone complex colored by the per residue confidence score (pLLDT) showing the accuracy of locally predicted structural elements in the model.

(C) 'Local' AlphaFold prediction of SPT2 and ASF1A histone binding domains bound to H3.1–H4 extracted from full-length alpha fold prediction, colored by Left: protein chain (SPT2: yellow; ASF1A: magenta; H3.1: red; H4: blue); Top right: PAE domain; Bottom right: pLLDT score. Related to Figure 3C-D.

(D) Alignment of local AlphaFold prediction of SPT2–H3.1–H4–ASF1A (colored as per panel C, with ASF1A omitted for clarity) to the crystal structure of SPT2–(H3.2–H4)<sub>2</sub> (white; PDB: 5BS7). Related to Figure 3E.

(E) Alignment of 'local' AlphaFold prediction of SPT2–H3.1–H4–ASF1A (colored as per panel C) to the crystal structure of Asf1–H3–H4 (white; PDB: 2HUE) demonstrating steric clashes between ASF1A (white) and the SPT2 aC2 helix that are released by a relocation of the SPT2 aC2 helix in the AlphaFold prediction (yellow). Related to Figure 3E.

(F) Top: AlphaFold prediction (as shown in panel C, with ASF1–H3.1–H4: white; SPT2: yellow, and residues mutated: red). Bottom: Pull-downs of FLAG-Myc-tagged SPT2 WT or mutants (M1 and M2) compared with control purification (-) from soluble cells extracts expressing Strep-HA-ASF1b WT probed by Western blot. Representative of n = 2 biological replicates.

Figure S4

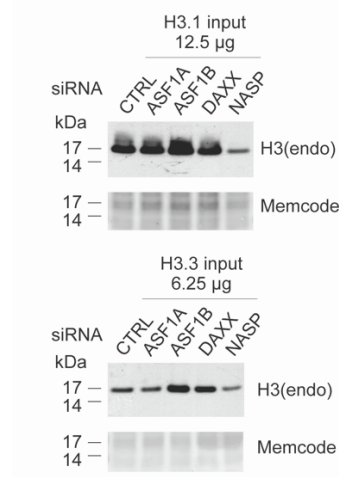

**Figure S4. Effect of chaperone depletion on endogenous histone H3 levels – Related to Figure 4**

Western blot of endogenous H3 in soluble extracts from cells expressing FLAG-HA tagged H3.1 (top) and H3.3 (bottom) siRNA depleted for ASF1A, ASF1B, DAXX or NASP and compared to control knockdowns siCTRL.

Representative of n=2 biological replicates.

Figure S5

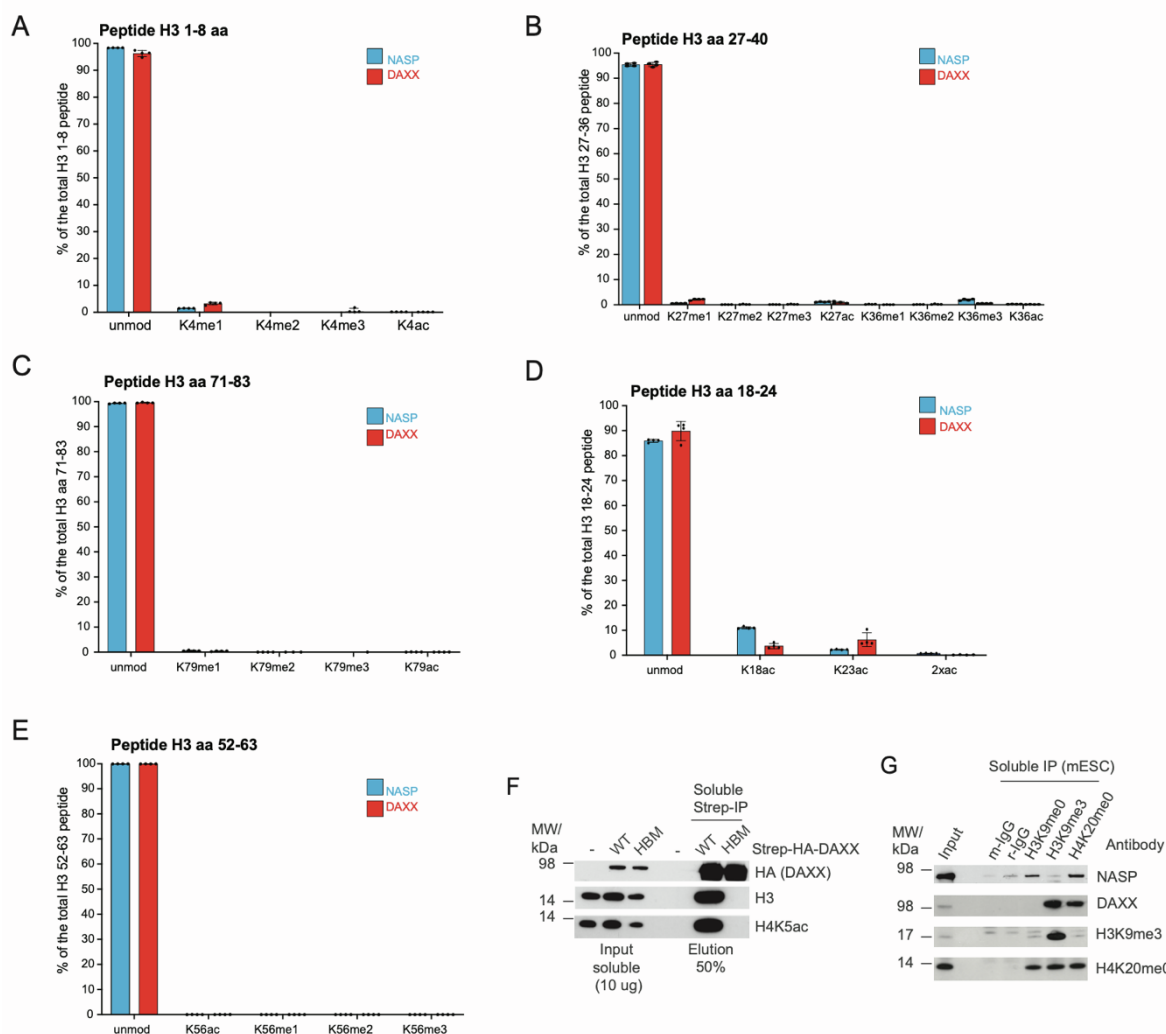

**Figure S5. Additional profiling of marks on histones H3–H4 in DAXX and sNASP complexes – Related to Figure 5.**

(A-E) Analysis by quantitative mass spectrometry of histone modifications as in Figure 6. The graphs show averages of four biological replicates with error bars indicating SD. PTMs were normalized using heavy peptides standards. See also Table S2.

(A) Quantification of modifications on H3 peptides 1-8.

(B) Quantification of modifications on H3 peptides 27-40.

(C) Quantification of modifications on H3 peptides 71-83.

(D) Quantification of modifications on H3 peptides 18-24.

(E) Quantification of modifications on H3 peptides 52-63.

(F) Pull-downs of Strep-HA-tagged DAXX WT or HBM compared with control purifications (–) from soluble cell extracts probed by Western blot. Representative of n=2 biological replicates.

(G) H3K9me0, H3K9me3 and H4K20me0 antibody pulldowns of endogenous histones from soluble mESC extracts compared to an IgG control, probed by Western blot. Representative of n=2 biological replicate.

**Figure S6**

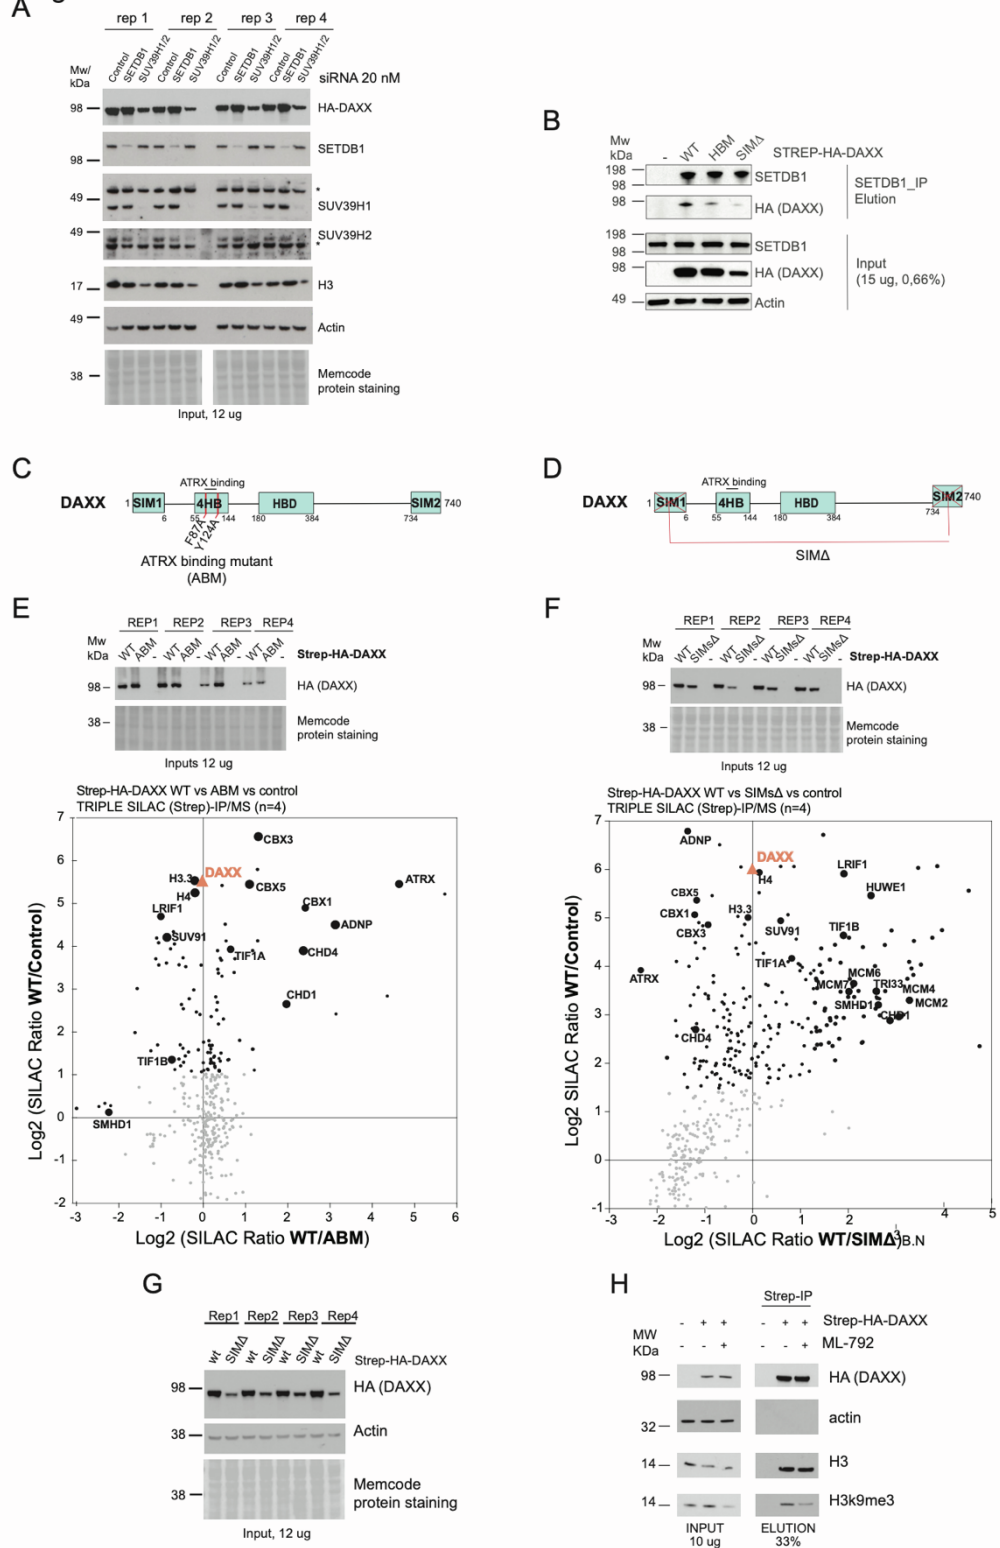



**Figure S6. Inputs and scatter plot of DAXX ABM and SIMs $\Delta$  triple SILAC IP-MS and histone PTMs experiments – Related to Figure 6.**

- (A) Western blot analysis of soluble extracts from cells expressing Strep-HA-tagged DAXX WT and siRNA depleted for either SETDB1 or SUV39H1/2 and compared with Control siRNA, used to perform the DAXX associated histone PTM profiling shown in **Figure 6A**. The figure is representative of n=4 biological replicates, however, the control sample from the second replicate was removed from the MS analysis due to insufficient material. \*, unspecific band.
- (B) Antibody pulldowns of endogenous SETDB1 compared with control purifications (–) from soluble cell extracts expressing Strep-HA-DAXX WT, HBM or SIM $\Delta$  mutants probed by Western blot. Representative of n=2 biological replicates.
- (C) Schematic domain architecture of DAXX ATRX binding mutant (ABM). Red lines indicate the point mutations in the 4-helix bundle (4HB) used to disrupt DAXX binding to ATRX.
- (D) Schematic domain architecture of DAXX SIM $\Delta$  mutant showing the location of the deleted SUMO interacting motifs 1/2 (SIM1/2).
- (E) (Top) Western blot analysis of soluble extracts from cells expressing STREP-HA-tagged DAXX (WT or ABM) and control cells (–), used in SILAC IP/MS pulldowns. (Bottom) Mass spectrometry analysis of SILAC labelled pull-downs of DAXX, WT and ABM and control.
- (F) (Top) Western blot analysis of soluble extracts from cells expressing STREP-HA-tagged DAXX (WT or SIM $\Delta$ ) and control cells (–), used in triple SILAC IP/MS pulldowns. (Bottom) Mass spectrometry analysis of SILAC labelled pull-downs of DAXX, WT and SIM $\Delta$  and control, LFQ intensities were bait normalized due to the lower expression level of DAXX SIM $\Delta$ .
- (E-F) Proteins referred to by human UniProt protein identification code. Data from n=4 biological replicates. Black indicates significant enrichment over control – see statistical thresholds in **Table S1**. Related to **Figure 6E**
- (G) Western blot analysis of soluble extracts from cells expressing Strep-HA-tagged DAXX WT or SIM $\Delta$ , used to perform the histone PTMs profiling. Data from n=4 biological replicates. Related to **Figure 6F**
- (H) Pulldown of Strep-HA-tagged DAXX from soluble HeLa S3 extracts induced to express either DAXX WT (+) or uninduced control cells (–). Cells were co-treated with ML-792 for 6 hrs as indicated. Representative of n=2 biological replicates.

A Figure S7

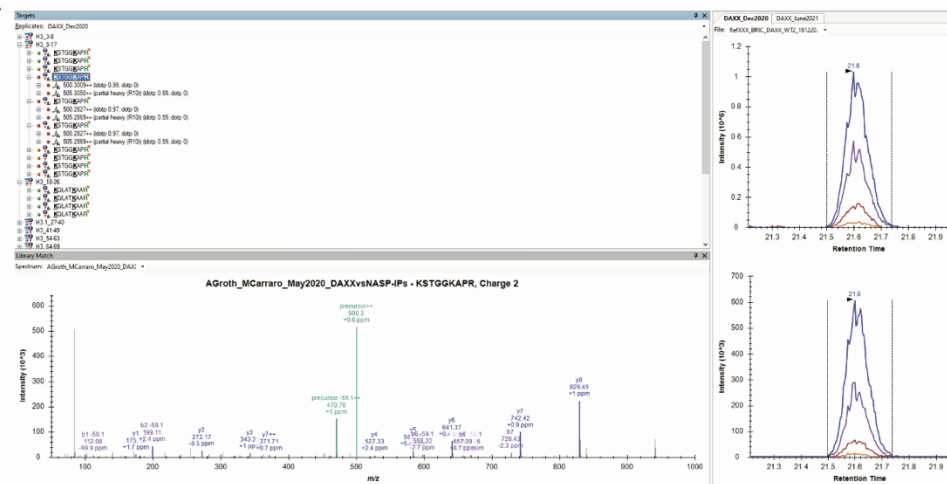

B

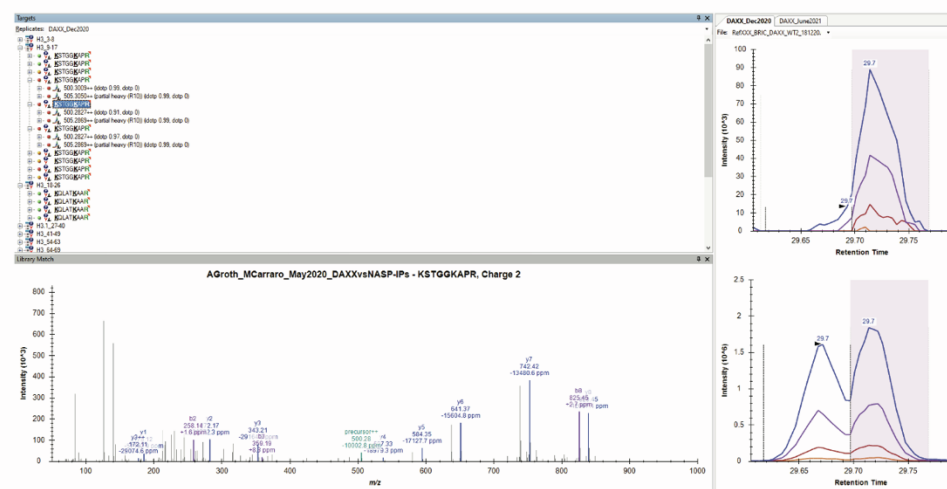

C

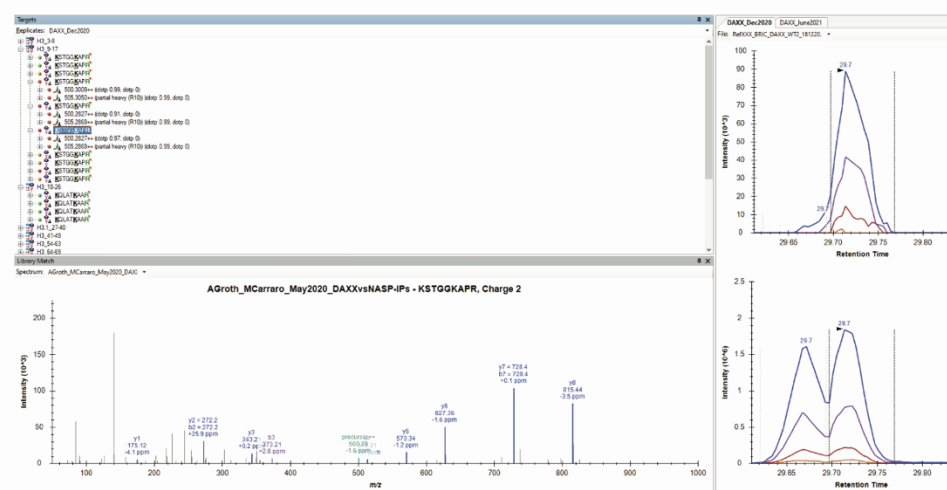

**Figure S7. MS2 spectra and MS1 chromatogram of H3K9-K14 modifications – Related to Figure 5 and Figure 6.**

(A) MS2 spectra and MS1 chromatogram of H3K9me3. Top left panel depicts the selected modified peptide in charge state +2 (light, endogenous peptide mass: 500.30 m/z; and heavy, standard mass: 505.30) with the first lysine (K9) being tri-methylated and the second lysine (K14) unmodified (actually, artificially propionylated during sample preparation). Bottom left panel depicts the corresponding MS2, fragment spectra which proves the correct identification of the K9me3+K14unmodified peptide with low mass errors (<2.0 ppm). Right panel depicts the corresponding MS1 peaks (bounded by the dashed lines) of the modified peptide in light version (top) and heavy version (bottom), eluting around 21.6 minutes.

(B) MS2 spectra and MS1 chromatogram of H3K9ac. Top left panel depicts the selected modified peptide in charge state +2 (light, endogenous peptide mass: 500.28 m/z; and heavy, standard mass: 505.28) with the first lysine (K9) being acetylated and the second lysine (K14) unmodified (actually, artificially propionylated during sample preparation). Bottom left panel depicts the corresponding MS2, which would need to accept extremely high mass errors to be assignable (>100 ppm), thus proving that K9ac+K14unmodified peptide is absent. Right panel depicts the corresponding MS1 peaks (bounded by the dashed lines) of the modified peptide in light version (top) and heavy version (bottom), eluting around 29.7 minutes. Note the clear presence of the heavy MS1 peak given the fact that it was spiked in the samples. Note as well that this peptide is isobaric with H3K14ac.

(C) MS2 spectra and MS1 chromatogram of H3K14ac. Top left panel depicts the selected modified peptide in charge state +2 (light, endogenous peptide mass: 500.28 m/z; and heavy, standard mass: 505.28) with the first lysine (K9) unmodified (actually, artificially propionylated during sample preparation) and the second lysine (K14) being acetylated. Bottom left panel depicts the corresponding MS2, fragment spectra which proves the presence of K9unmodified+K14ace peptide given the low mass errors (<2.0 ppm). Right panel depicts the corresponding MS1 peaks (bounded by the dashed lines) of the modified peptide in light version (top) and heavy version (bottom), eluting around 29.7 minutes. Note the clear presence of both the light and heavy MS1 signals. Note as well that this peptide is isobaric with H3K9ac.

## **Supplemental Materials and Excel table title and legends**

Supplementary Table S1. Statistically processed mass spectrometry data set, related to Figures 1B,1C, 2A-B, 3A, 4A-C, 5G, 6C, S1B-F, S2A-B, S6E, S6F.

Supplementary Table S2. Processed histone PTMs identified by mass spectrometry, related to Figures 5B-E, 6A-E, S5C-G.

Supplementary Material S1. Interactive and expandable cytoscape sessions with the histone-dependent and -independent chaperone network, related to Figure 1B and 2A.
